1 **IGF2BP1 is a targetable SRC/MAPK-dependent driver of invasive growth in ovarian**  
2 **cancer**

3

4 **Authors:** Nadine Bley<sup>1\*\$#</sup>, Annekatri Schott<sup>1\*</sup>, Simon Müller<sup>1</sup>, Danny Misiak<sup>1</sup>, Marcell  
5 Lederer<sup>1</sup>, Tommy Fuchs<sup>1</sup>, Chris Aßmann<sup>1</sup>, Markus Glaß<sup>1</sup>, Christian Ihling<sup>2</sup>, Andrea Sinz<sup>2</sup>,  
6 Nikolaos Pazaitis<sup>3</sup>, Claudia Wickenhauser<sup>3</sup>, Martina Vetter<sup>4</sup>, Olga Ungurs<sup>4</sup>, Hans-Georg  
7 Strauss<sup>4</sup>, Christoph Thomssen<sup>4</sup>, Stefan Hüttelmaier<sup>1§</sup>.

8

9

10 **Addresses:**

11 <sup>1</sup> Sect. Molecular Cell Biology, Inst. of Molecular Medicine, Charles Tanford Protein Center,  
12 Medical Faculty, Martin Luther University Halle-Wittenberg, Kurt-Mothes-Str. 3A, 06120 Halle,  
13 Germany

14 <sup>2</sup> Dept. of Pharmaceutical Chemistry & Bioanalytics, Inst. of Pharmacy, Charles Tanford  
15 Protein Center, Martin Luther University Halle-Wittenberg, Kurt-Mothes Str. 3A, 06120 Halle,  
16 Germany

17 <sup>3</sup> Inst. of Pathology, Medical Faculty, Martin Luther University Halle-Wittenberg, Magdeburger  
18 Str. 14, 06112 Halle, Germany

19 <sup>4</sup> Clinics for Gynecology, Medical Faculty, Martin Luther University Halle-Wittenberg, Ernst-  
20 Grube-Str. 40, 06120 Halle, Germany

21

22

23 **\* These authors contributed equally to this work**

24 **\$ shared corresponding authorship**

25 **# Correspondence:** should be addressed to Nadine Bley

26 **Running title:** IGF2BP1-directed AJ disassembly depends on SRC activation

27 **Disclosure of Potential Conflicts of Interests:** the authors declare no conflicts of interest.

28

29

30

31

32

33

34

1 **Abstract (175/250)**

2 Epithelial-to-mesenchymal transition (EMT) is a hallmark of aggressive, mesenchymal-like  
3 high-grade serous ovarian carcinoma (HG-SOC). The SRC kinase is a key driver of cancer-  
4 associated EMT promoting adherens junction (AJ) disassembly by phosphorylation-driven  
5 internalization and degradation of AJ proteins. Here we show, that the IGF2 mRNA binding  
6 protein 1 (IGF2BP1) is up-regulated in mesenchymal-like HG-SOC and promotes SRC  
7 activation by a previously unknown protein-ligand-induced, but RNA-independent mechanism.  
8 IGF2BP1-driven invasive growth of ovarian cancer cells essentially relies on the SRC-  
9 dependent disassembly of AJs. Concomitantly, IGF2BP1 enhances ERK2 expression in a  
10 RNA-binding dependent manner. Together this reveals a post-transcriptional mechanism of  
11 interconnected stimulation of SRC/ERK signaling in ovarian cancer cells. The IGF2BP1-  
12 SRC/ERK2 axis is targetable by the SRC-inhibitor saracatinib and MEK-inhibitor selumetinib.  
13 However, due to IGF2BP1-directed stimulation only combinatorial treatment effectively  
14 overcomes the IGF2BP1-promoted invasive growth in 3D culture conditions as well as  
15 intraperitoneal mouse models. In conclusion, we reveal an unexpected role of IGF2BP1 in  
16 enhancing SRC/MAPK-driven invasive growth of ovarian cancer cells. This provides a rational  
17 for the therapeutic benefit of combinatorial SRC/MEK inhibition in mesenchymal-like HG-SOC.  
18

**Graphical Abstract:**

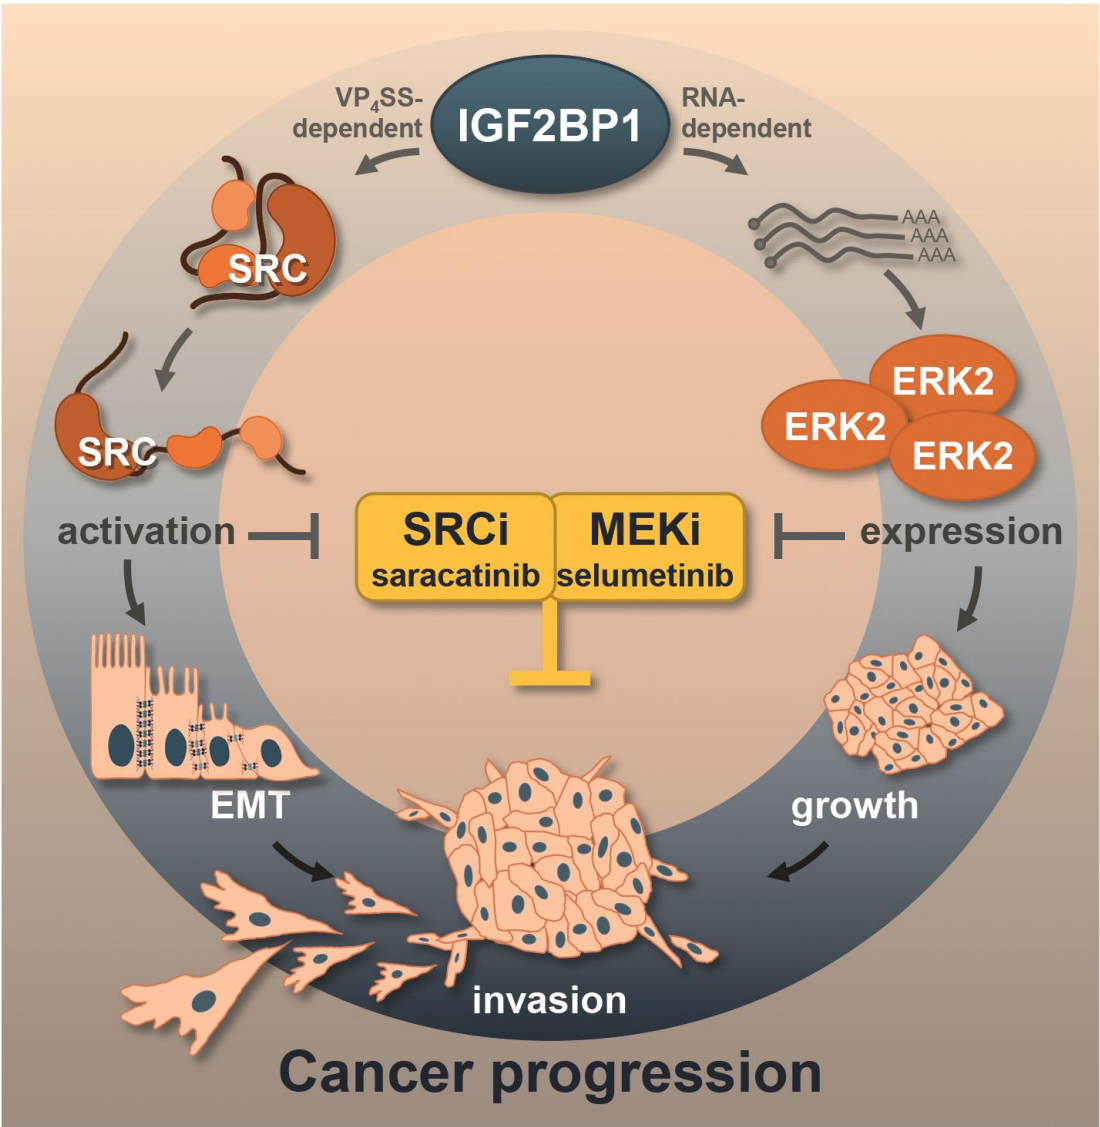

## 1 Introduction

2 EOC (epithelial ovarian carcinoma) has the highest death rates among female cancers  
3 and improvement of therapeutic efficacies remains dismal [1]. Although promising initially,  
4 PARP- and SRC-directed therapies suffer from occurring resistances and the lack of  
5 biomarkers required to identify patients benefitting from the respective treatments [2-5].

6 Unsupervised clustering of patient samples by transcriptome data identified molecular  
7 subtypes of HG-SOCs with distinct characteristics, including an invasive, mesenchymal-like  
8 subtype, observed in approximately 30% of patients [1, 6-8]. EMT, characterized by the loss  
9 of CDH1 (E-cadherin) positive cell-cell contacts termed adherens junctions (AJs), is thought to  
10 underly progression of the mesenchymal-like subtype. The SRC protein kinase is a crucial  
11 activator of AJ disassembly with elevated activity in EOC patients [9, 10]. SRC phosphorylates  
12 AJ components like CTNNB1 ( $\beta$ -Catenin), CDH1 or CDH2 (N-cadherin) resulting in their  
13 internalization and/or degradation [9, 11-13]. In EOC-derived OVCAR-3 cells, SRC promotes  
14 EMT, and this activity is further pronounced by ERK2 [14]. ERK2 activates SRF (serum  
15 response factor) driving the transcription of ECM molecules and integrins [15]. This was  
16 suggested to promote tumor growth, mesenchymal properties and metastasis. Accordingly,  
17 small molecule inhibitors of SRC and ERK1/2-activating MEK, in particular saracatinib and  
18 selumetinib, are tested individually in clinical trials (ClinicalTrials.gov Identifiers:  
19 NCT01196741; NCT00610714; NCT00551070; NCT03162627) [5, 16]. In EOC xenograft  
20 models, their co-application proved beneficial over single drug therapies, since MEK inhibition  
21 re-sensitized saracatinib resistant cells [2, 10]. These findings provide preclinical evidence  
22 suggesting that the combination of SRC and MEK inhibitors is beneficial in the treatment of  
23 ovarian cancer, and highlights the need for identifying biomarkers for selecting patients for  
24 clinical trials [2].

25 IGF2BP1 is an oncofetal RNA-binding protein (RBP) up-regulated in a variety of solid  
26 tumors [17]. In cancer, IGF2BP1's main function is the partially m<sup>6</sup>A-dependent (N<sup>6</sup>-  
27 methyladenosine) impairment of miRNA-directed mRNA decay [15, 18-23]. This results in

1 elevated expression of oncogenic factors like LIN28B, HMGA2, MYC, SRF and ERK2. During  
2 development, the spatially restricted synthesis of ACTB is essentially controlled by the SRC-  
3 directed phosphorylation of IGF2BP1 [24]. SRC associates with IGF2BP1 at a SH3-binding  
4 VP<sub>4</sub>SS motif conserved in the SRC substrate and cell adhesion protein Paxillin (PXN) [25].

5 IGF2BP1 is up-regulated in EOC and associated with adverse patient outcome [19, 26].  
6 Its depletion or deletion decreases the spheroid growth, migration, and invasion of ovarian  
7 cancer cells *in vitro* and reduces tumor growth as well as metastasis *in vivo* [18, 19, 27]. In  
8 melanoma-derived cell lines, IGF2BP1 enforces mesenchymal tumor cell properties in a LEF1-  
9 dependent manner [28]. However, if and how IGF2BP1 modulates EMT in EOC remained  
10 elusive.

11 Here we reveal a novel, RNA-independent mechanism of IGF2BP1-dependent SRC  
12 activation. In concert with enhancing ERK2 expression, IGF2BP1 promotes SRC/ERK2-  
13 signaling in EOC-derived cells providing a rationale for the therapeutic inhibition of SRC and  
14 MEK in mesenchymal-like HG-SOC.

15

16

## 17 **Results**

### 18 **IGF2BP1 is a pro-mesenchymal driver up-regulated in the C5 subtype of HG-SOC**

19 Consistent with previous findings, IGF2BP1 expression is associated with adverse  
20 prognosis in EOC tumors [18, 19, 26] (Supplementary Figure 1A,B). Correlation analyses in  
21 three independent transcriptome datasets indicated that IGF2BP1 mRNA expression is  
22 strongly associated with the C5 subtype of HG-SOC (Figure 1A; Supplementary Figure S1C-  
23 F). In agreement, IHC (immunohistochemistry) revealed a higher Remmele score for IGF2BP1  
24 in C5 tumors derived from a local tumor cohort (Figure 1B,C; Supplementary Table T1B). To  
25 identify candidate effector pathways of IGF2BP1 in EOC, the TCGA-provided transcriptome  
26 data set was separated in IGF2BP1 low (< 5 cpm) and high (> 5 cpm) expressing tumors.

1 Median IGF2BP1 mRNA expression was more than 25-fold up-regulated in one third of  
2 patients (Figure 1D; Supplementary Table T1A). Gene set enrichment analyses (GSEA) using  
3 the fold change of gene expression identified significant up-regulation of proliferation- and  
4 EMT-associated gene sets in IGF2BP1-high vs. low tumors (Figure 1E; Supplementary Figure  
5 S1G and Tables T1A-3). In agreement with a pro-mesenchymal role of IGF2BP1, the protein  
6 was markedly elevated in a subset of mesenchymal-like EOC-derived cell lines (Figure 1F,G).  
7 These were characterized by high abundance of mesenchymal markers VIM, CDH2 and ZEB1  
8 and low levels of epithelial markers CDH1, KRT8 and EPCAM (Figure 1F,G; Supplementary  
9 Table T4). Immunostaining of CTNNB1 and F-actin labeling confirmed a pronounced  
10 mesenchymal-like morphology of ES-2 cells with diminished CTNNB1-positive cell-cell  
11 contacts when compared to epithelial-like OVCAR-3 cells (Figure 1H, I). To test if IGF2BP1  
12 promotes a mesenchymal-like phenotype in EOC-derived cells, the protein was depleted or  
13 over-expressed in a panel of EOC-derived cells. IGF2BP1 depletion reduced 3D spheroid  
14 growth and invasion in all EOC cell lines tested (Figure 1 J,K; blue boxes). Strikingly, the forced  
15 expression of GFP-fused IGF2BP1 significantly elevated the invasive growth of OVCAR-3 and  
16 ES-2 cells (Figure 1 J,K; red boxes). In sum, this indicated that IGF2BP1 is a marker of the C5  
17 subtype of HG-SOC, promoting invasive growth in EOC-derived cell models.

18  
19  
20  
21  
22  
23  
24  
25  
26  
27  
28  
29

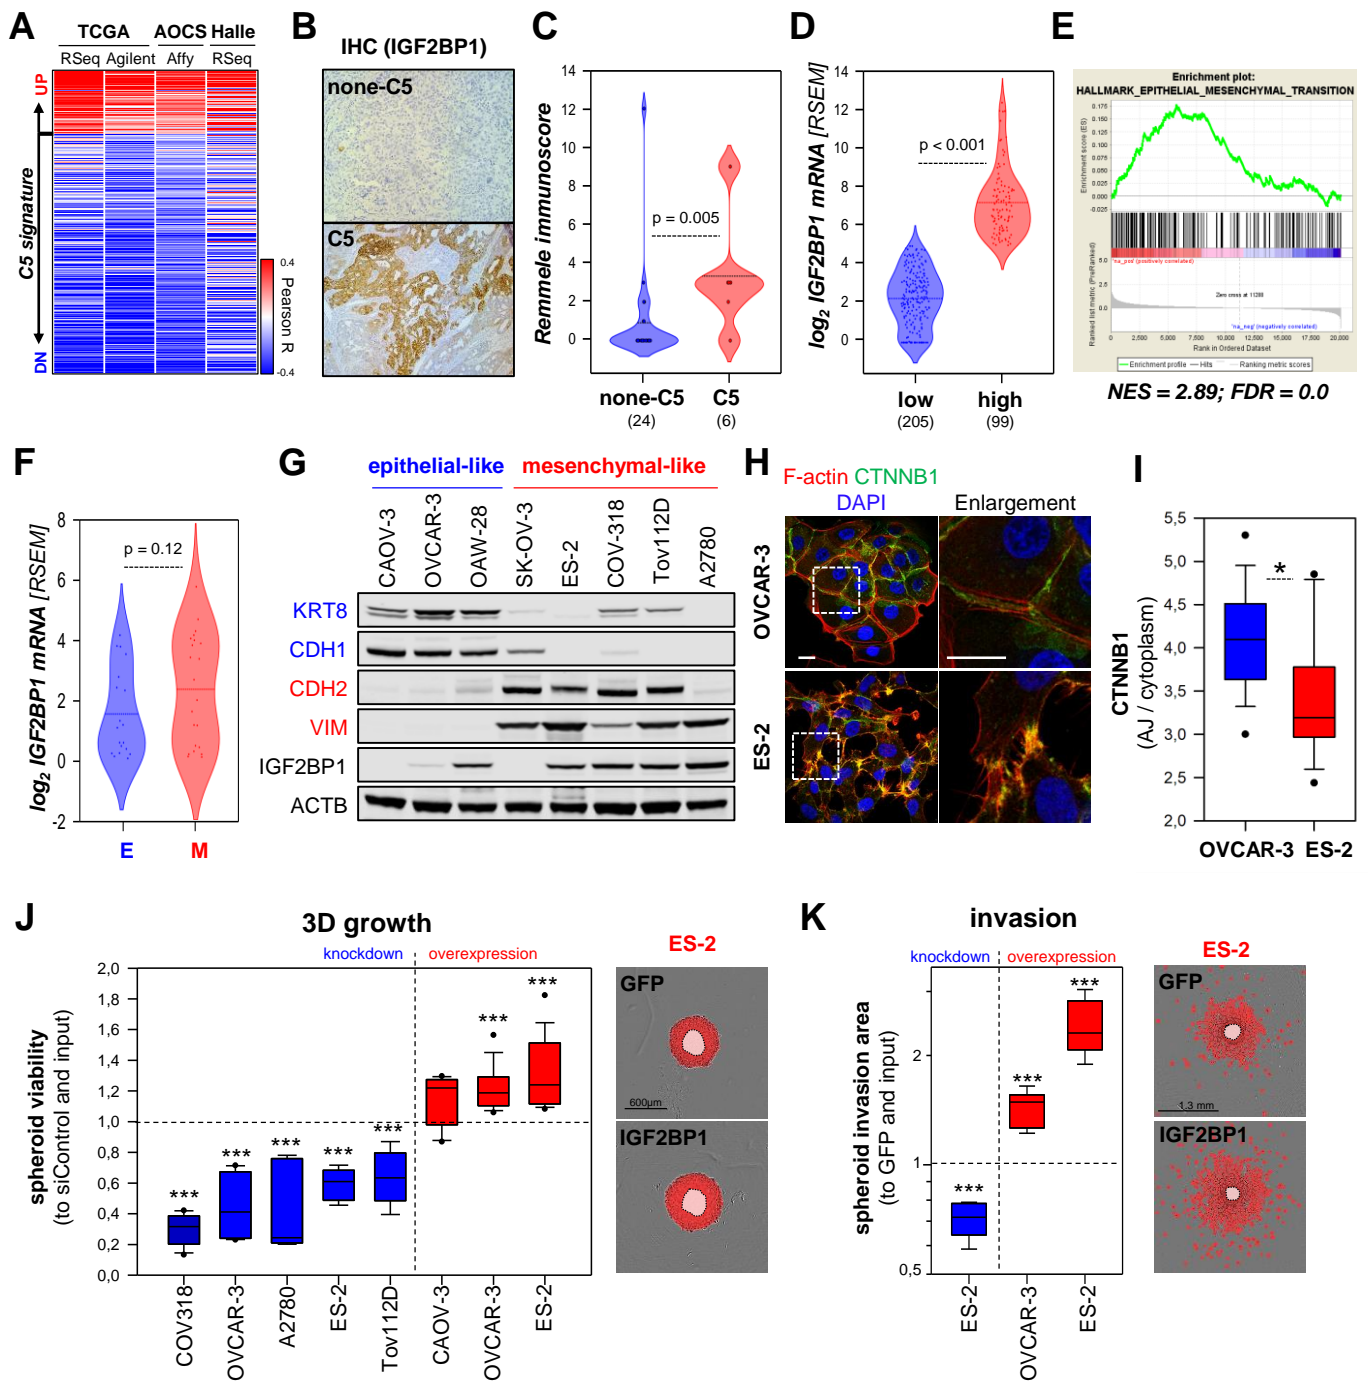

Bley et al., Figure 1

1 **Figure 1. IGF2BP1 is associated to the C5 signature and promotes mesenchymal**  
2 **properties. (A)** IGF2BP1 expression was correlated to the C5 signature using indicated data  
3 sets. Pearson correlation coefficients (R) are shown as heat map. **(B,C)** IHC staining of EOC  
4 samples classified as C5 or none-C5 via NGS based GSEA analyses using IGF2BP1 directed  
5 antibodies (B). IGF2BP1 staining was quantified using the Remmele immune score in none-  
6 C5 (24) and C5 (6) samples (C). **(D)** IGF2BP1 mRNA expression is shown by violin plots, in  
7 the TCGA-OV-RNA-Seq cohort distinguished in IGF2BP1-high ( $\log_2$  RSEM  $\geq 5$ ) or -low ( $\log_2$   
8 RSEM  $\leq 5$ ). **(E)** GSEA plot of the HALLMARK\_EMT gene set based on gene ranking by fold  
9 change expression between IGF2BP1-high vs -low samples as in (D). **(F)** Violin plot of  
10 IGF2BP1 mRNA expression in EOC-derived cells, classified as epithelial-like (E, blue) or  
11 mesenchymal-like (M, red) by the differential mRNA expression (Cancer Cell Line  
12 Encyclopedia; CCLE expression data) of epithelial (CDH1, KRT8 and/or EPCAM) and  
13 mesenchymal (VIM, ZEB1 and/or CDH2) markers. **(G)** Western blotting of IGF2BP1 and  
14 indicated epithelial (blue) and mesenchymal (red) markers. VCL (vinculin) served as loading  
15 control. **(H,I)** Immunostaining of CTNNB1 and F-actin using Phalloidin-TRITC in indicated cell  
16 lines. Dashed boxes depict enlarged regions. Scale bar 25  $\mu\text{m}$ . The ratio of CTNNB1  
17 membrane to cytoplasmic localization was determined in 15 cells over three independent  
18 analyses. **(J)** 3D growth of indicated cell lines upon IGF2BP1 knockdown (blue) or over-  
19 expression (red), as determined by Cell Titer Glo relative to controls and input. Representative  
20 images of ES-2 cells expressing GFP or GFP-IGF2BP1 overlaid with growth detection masks  
21 (red) and input spheroids (light red) are shown. **(K)** Invasion of pre-formed Matrigel embedded  
22 spheroids of ES-2 cells upon IGF2BP1 knockdown (blue) or over-expression (red) was  
23 monitored in an Incucyte S3. Representative images overlaid with invasion detection masks  
24 (red) or input spheroids (light red) are shown. Box plots in J and K are derived from analyses  
25 of 6-9 spheroids in three independent experiments. Statistical significance was determined by  
26 Student's T-test or Mann-Whitney rank sum test. \*,  $p < 0.05$ ; \*\*\*,  $p < 0.001$ .

27

28

## 29 **IGF2BP1 promotes the disassembly of adherens junctions**

30 How aberrant IGF2BP1 expression modulates cell morphology was investigated in  
31 epithelial-like OVCAR-3 and mesenchymal-like ES-2 cells. IGF2BP1 over-expression in  
32 OVCAR-3 enhanced the formation of lamellipodia and led to partial disassembly of cell  
33 colonies (Figure 2A, arrow heads). IGF2BP1 depletion in ES-2 cells reduced spindle-like  
34 morphologies in favor of a compact, flattened shape and enhanced the formation of colonies,  
35 as previously observed [28]. This implied IGF2BP1-dependent regulation of cell-cell contacts,  
36 in particular the modulation of AJ integrity, analyzed further by CDH1 and CTNNB1  
37 immunostaining. IGF2BP1 overexpression in OVCAR-3 cells converted mature AJs to  
38 premature, zipper-like AJs (Figure 2B). Quantification of AJ/cytoplasm fluorescence intensities  
39 confirmed decreased AJ localization of CDH1 and CTNNB1, suggesting enhanced



1 internalization and/or decay due to IGF2BP1 overexpression.

2 In ES-2 cells, the depletion of IGF2BP1 induced severe morphological changes  
3 reminiscent of a partial mesenchymal-to-epithelial (MET) transition (Figure 2A and D). This  
4 was indicated by markedly increased CDH2 and CTNNB1 AJ-recruitment, although CDH1  
5 expression was not restored (Figure 2D). Furthermore, IGF2BP1 knockdown enforced  
6 reorganization of the intermediate as well as microfilament system and induced the formation  
7 of premature AJs (Supplementary Figure S2A-C). These even showed increased recruitment  
8 of the AJ-stabilizing factor CTNND1 ( $\delta$ -Catenin) (Supplementary Figure S2B; [29]). MET-like  
9 transition, indicated by enriched AJ-localization of CDH2 and CTNNB1 was conserved in a  
10 panel of EOC-derived cells and cell lines of other origin depleted for IGF2BP1 (Supplementary  
11 Figure S2D,E). The deletion of IGF2BP1 in ES-2 cells led to drastic MET-like morphological  
12 changes culminating in the formation of mature AJs (Supplementary Figure S3A). On the  
13 contrary, IGF2BP1 overexpression further reduced the AJ-localization of CTNNB1 and CDH2  
14 in ES-2 and COV-318 cells (Supplementary Figure S3B,C). This re-localization was essentially  
15 abolished by depleting exogenous IGF2BP1 in ES-2 (Supplementary Figure S3B).

16 How IGF2BP1 influences the expression of AJ proteins, was analyzed further by  
17 monitoring mRNA and protein abundance by mRNA-sequencing and quantitative MS analyses  
18 upon IGF2BP1 depletion in ES-2 cells (Figure 2C; Supplementary Table T5). This was  
19 associated with up-regulation of AJ proteins CDH2, CDH5, CTNNA1 and CTNNB1. Together  
20 these observations supported the notion that IGF2BP1 up-regulation is a driver of AJ  
21 disassembly and EMT in EOC cells.

22

23

24

25

26

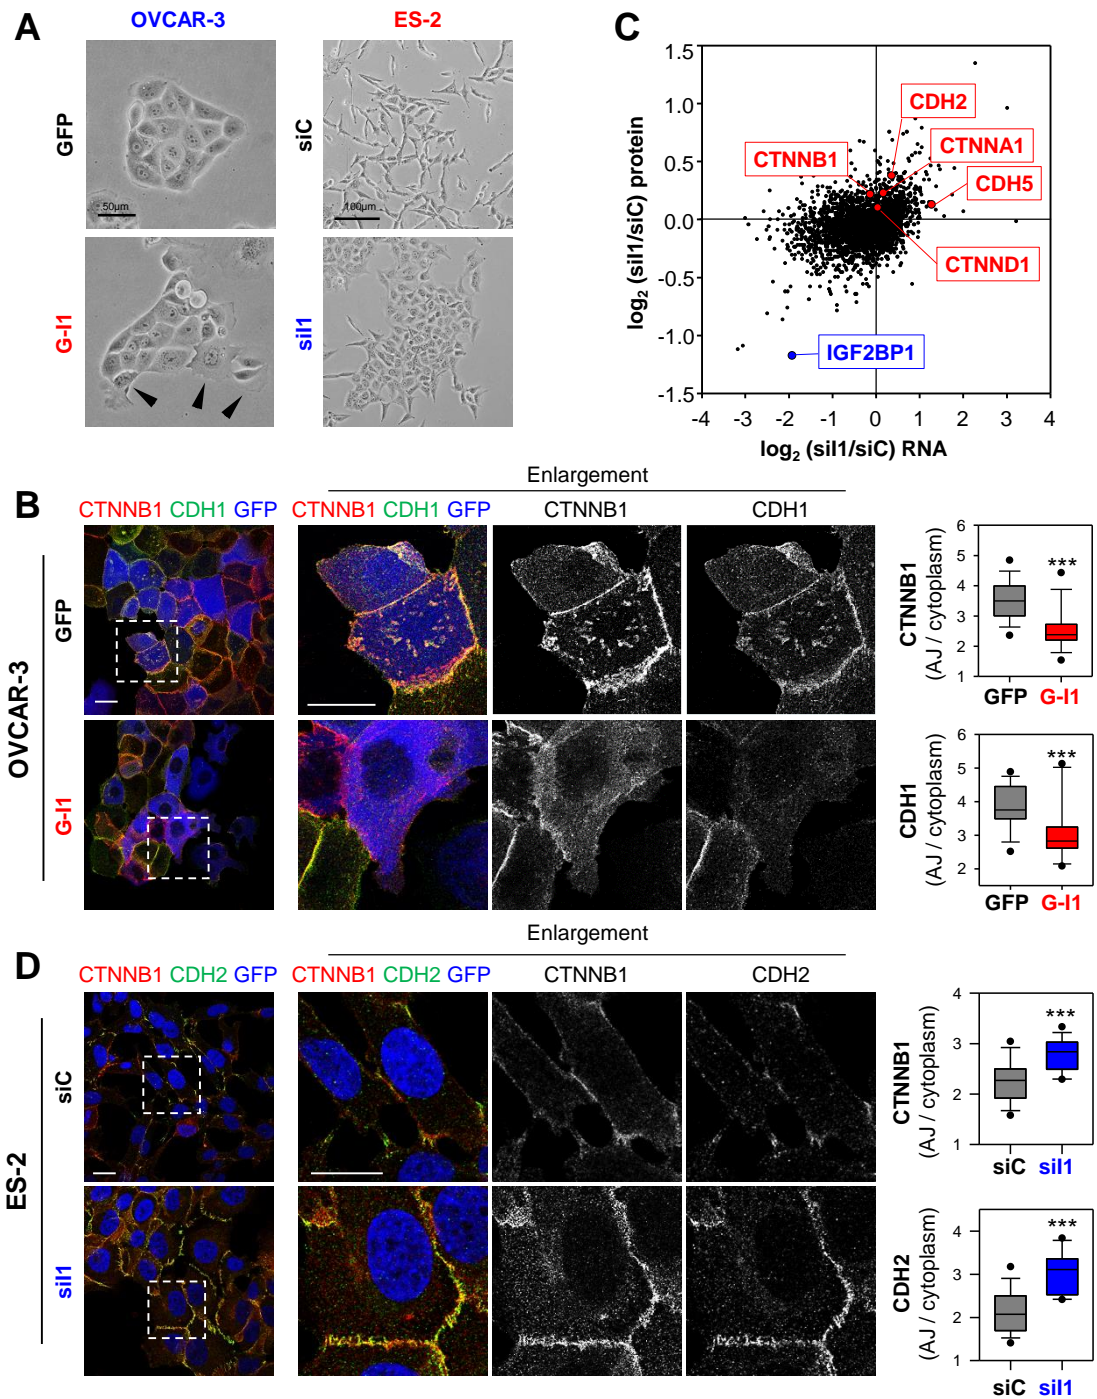

Bley et al., Figure 2

1 **Figure 2. IGF2BP1 promotes AJ disassembly. (A)** Phase contrast images of OVCAR-3 and  
2 ES-2 cells upon GFP or GFP-IGF2BP1 (G-I1) over-expression and IGF2BP1 (sil1) or control  
3 depletion (siC). Arrowheads indicate colony-detaching cells. **(B)** Immunostaining of IGF2BP1  
4 over-expressing or control OVCAR-3 cells with indicated antibodies. Over-expression is  
5 pseudo-colored in blue. Dashed boxes depict enlarged region shown in middle panels. The  
6 localization of CDH2 and CTNNB1 was assessed by immunostaining. The  
7 membrane/cytoplasmic ratio of fluorescence intensities is shown by box plots (right panels).  
8 **(C)** Log<sub>2</sub> fold change of protein expression (quantitative proteomics) upon IGF2BP1 depletion  
9 in ES-2 cells plotted over the respective log<sub>2</sub> fold changes in RNA abundance (NGS). Selected  
10 AJ proteins are indicated in red, IGF2BP1 is highlighted in blue. **(D)** ES-2 cells with transient  
11 IGF2BP1 depletion were analyzed as in (B). Scale bars 25 μm. 15 cells per condition were  
12 analyzed in three independent experiments. Statistical significance was tested by student's T-  
13 test. \*\*\*, p < 0.001.

14

## 15 **IGF2BP1 regulates SRC activity**

16 IGF2BP1 is a key regulator of mRNA turnover in cancer cells, suggested to control  
17 CTNNB1 mRNA turnover in breast cancer cells [15, 19, 20, 30]. However, with the exception  
18 of CDH5, steady state mRNA levels or mRNA turnover of AJ components including CTNNB1  
19 remained unchanged upon IGF2BP1 depletion (Figure 2C; Supplementary Figure S4A).  
20 Moreover, the activity of CDH2- and CTNNB1-3'UTR luciferase reporters remained unaffected  
21 by IGF2BP1 knockdown (Supplementary Figure S4B). This largely excluded 3'UTR-dependent  
22 regulation by IGF2BP1, as previously reported for ACTB and MAPK4 mRNAs [24, 27]. Instead,  
23 our findings implied that elevated AJ formation upon IGF2BP1 depletion, involves altered  
24 turnover of AJ proteins [29, 31]. In agreement, the decay of CDH2 and CTNNB1 proteins was  
25 significantly reduced by IGF2BP1 knockdown (Figure 3A,B).

26 The phosphorylation of some AJ proteins, e.g. CDH2, by SRC kinase promotes AJ  
27 disassembly and subsequently protein decay [9, 11-13]. Consistently, AJ localization and total  
28 abundance of CTNNB1 and CDH2 were elevated upon treatment of ES-2 cells with the SRCi  
29 PP2 (Figure 3C,D; Supplementary Figure S4C). In view of IGF2BP1's association with the SH3  
30 domain of SRC [24], it appeared tempting to speculate that IGF2BP1 influences SRC activity.  
31 Western blotting revealed that SRC activity, indicated by phosphorylation at tyrosine 419  
32 (Y419) in the kinase domain, was substantially reduced upon IGF2BP1 depletion in all EOC-

derived cell lines tested (Figure 3E; Supplementary Figure S4D). Conversely, increased Y419-SRC phosphorylation was observed upon the over-expression of IGF2BP1 in OVCAR-3 cells (Figure 3F). SRC expression remained essentially unchanged by aberrant IGF2BP1 expression. In sum, these findings suggested that IGF2BP1-directed activation of SRC promotes AJ disassembly in EOC-derived cells.

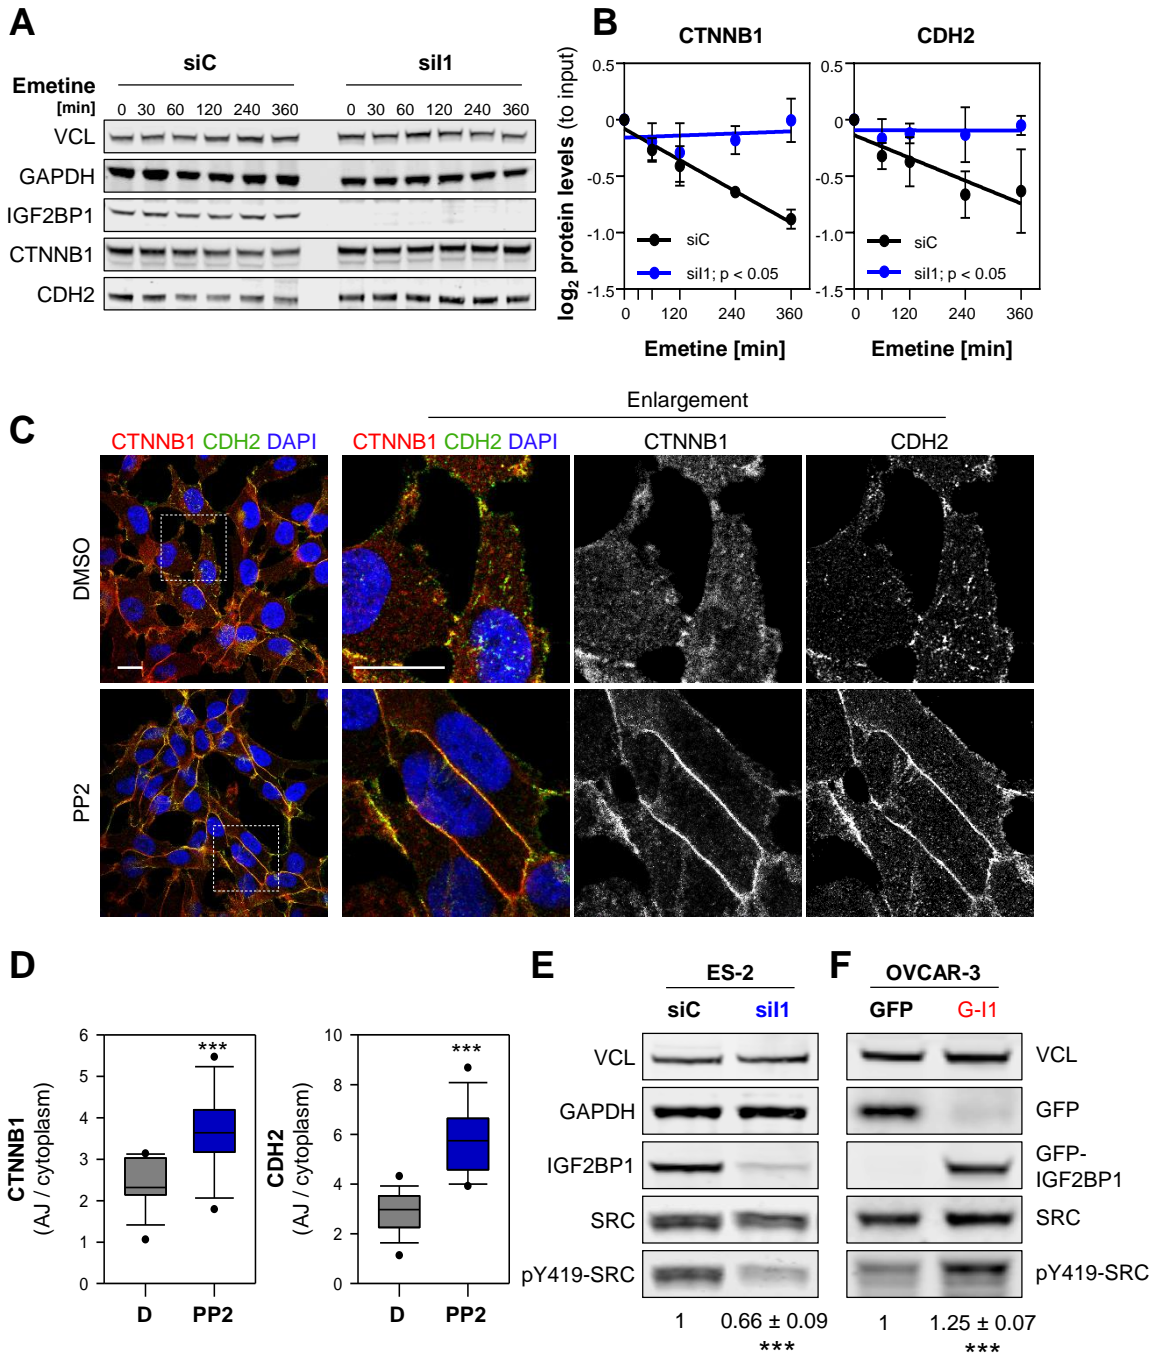

1 **Figure 3. IGF2BP1 destabilizes AJs in a SRC-dependent manner. (A,B)** Turnover of  
2 indicated proteins was determined by blocking protein synthesis with Emetine (100 $\mu$ M) by  
3 Western blotting upon IGF2BP1 (sil1) and control (siC) knockdown. GAPDH and VCL served  
4 as loading controls to determine protein abundance relative to input levels. **(C,D)**  
5 Immunostainings of ES-2 cells treated with PP2 (1 $\mu$ M) or DMSO for 48h using indicated  
6 antibodies (C). Dashed box indicates enlargement. Scale bars 25  $\mu$ m. The AJ/cytoplasmic ratio  
7 of CDH2 and CTNNB1 is shown by box plots (D). **(E,F)** Western blot analyses of indicated  
8 proteins in ES-2 cells upon IGF2BP1 depletion (E) and OVCAR-3 cells (F) with GFP or GFP-  
9 IGF2BP1 (G-I1) over-expression. SRC activity, indicated by Y419 phosphorylation, was  
10 normalized to SRC expression, as depicted under the lanes. VCL served as loading control.  
11 Error bars show SD determined in three independent experiments. Statistical significance was  
12 tested by Student's T-test. \*,  $p < 0.05$ ; \*\*\*,  $p < 0.001$ .

13

14

### 15 **IGF2BP1 promotes SRC activation via a SH3-ligand-binding mechanism**

16 Previous studies identified IGF2BP1 as a SRC substrate and suggested association of  
17 the kinase's SH3 domain at a VP<sub>4</sub>SS motif in IGF2BP1 [24]. This putative SRC-binding site is  
18 highly conserved among IGF2BP1 orthologues and identical to the SRC-docking site of the  
19 adhesion molecule Paxillin (Figure 4A) [24, 25, 32]. SRC activity is repressed by an  
20 intramolecular interaction (closed conformation) [33]. Activation, indicated by an open  
21 conformation enabling auto-phosphorylation at pY419 in the kinase domain, is controlled by  
22 various means including ligand-binding induced mechanisms [34]. The latter were described  
23 for some SRC substrates including Paxillin and the RNA-binding proteins hnRNPK and SAM68  
24 [32, 35, 36]. To test if IGF2BP1 promotes SRC activity via its VP<sub>4</sub>SS motif, increasing amounts  
25 of GFP-tagged proteins were expressed in ES-2 cells and SRC activity was monitored by  
26 Western blotting for pY419-SRC (Figure 4B,C). This revealed dose-dependent up-regulation  
27 of pY419-SRC by wild type (WT) and RNA-binding deficient (KH) IGF2BP1 (Figure 4B,C) [19,  
28 37]. In contrast, SRC activity remained unchanged upon deletion of the VP<sub>4</sub>SS motif in  
29 IGF2BP1 ( $\Delta$ SH3). Although less efficient, SRC-activity was also enhanced by over-expression  
30 of the GFP-fused VP<sub>4</sub>SS peptide (SH3motif). In sum, this unraveled that IGF2BP1 promoted  
31 SRC activity in a dose-dependent manner by a ligand-binding induced, but RNA-binding  
32 independent mechanism.

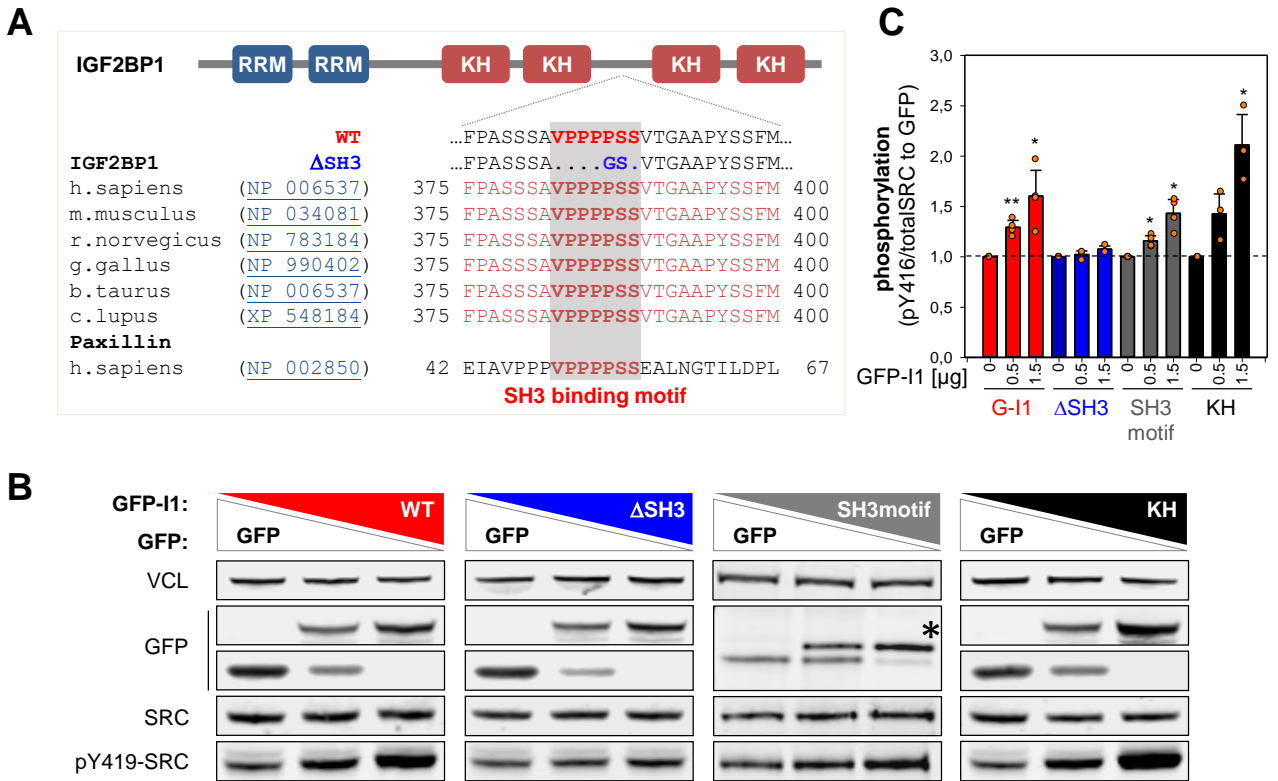

Bley et al., Figure 4

**Figure 4. IGF2BP1 promotes SRC activation via its SH3-binding VP4SS motif. (A)** Schematic representation of VP4SS conservation among IGF2BP1 orthologs and human paxillin. The domain organization of IGF2BP1 is shown in the upper panel (RRM, RNA recognition motif; KH, hnRNPk homology domain). **(B)** Representative Western blot analyses of indicated proteins in ES-2 cells transiently expressing GFP alone (lane 1) a mixture of GFP and indicated GFP-fused proteins (lane 2) or only GFP-fused proteins. WT, GFP-IGF2BP1WT;  $\Delta$ SH3, GFP-IGF2BP1 $\Delta$ SH3; SH3motif, GFP-VP4SS; KH, GFP-IGF2BP1KHmut. VCL served as loading control. **(C)** Quantification of Western blots shown in (B). Error bars indicate SD determined in three independent experiments. Statistical significance was tested by Student's T-test. \*,  $p < 0.05$ ; \*\*,  $p < 0.01$ .

## 1 **The IGF2BP1-SRC axis enhances EMT and invasive growth of EOC-derived cells**

2           The physiological relevance of IGF2BP1-dependent control of SRC activity was  
3 analyzed by monitoring AJ integrity using immunostaining (Figure 5A,B). IGF2BP1 over-  
4 expression in OVCAR-3 or re-expression in IGF2BP1-deleted ES-2 cells impaired the AJ  
5 localization of CTNNB1, CDH1 or CDH2 compared to GFP controls. Similar to wild type  
6 IGF2BP1, the RNA-binding deficient (KH) protein substantially impaired AJ assembly. In  
7 contrast, AJ localization of the respective proteins was essentially unchanged by over- or re-  
8 expression of IGF2BP1 lacking the VP<sub>4</sub>SS motif ( $\Delta$ SH3).

9           However, only wild type IGF2BP1 substantially promoted both, 3D spheroid growth and  
10 invasion of ES-2 cells (Figure 5C,D). In contrast, invasive growth was only modestly elevated  
11 by  $\Delta$ SH3 and KH mutant proteins. To investigate the role of IGF2BP1-dependent SRC-  
12 activation in invasive growth, the kinase was inhibited by PP2 in ES-2 cells overexpressing  
13 IGF2BP1 (Supplementary Figure S4E). This essentially abolished IGF2BP1-directed invasion.  
14 Collectively, these findings indicated a pivotal role of IGF2BP1-directed SRC activation in AJ  
15 integrity and invasive growth of EOC-derived cells. However, full potential in promoting  
16 invasive growth requires both, the RNA-independent activation of SRC and presumably the  
17 RNA-dependent regulation of mRNA fate by IGF2BP1.

18

19

20

21

22

23

24

25

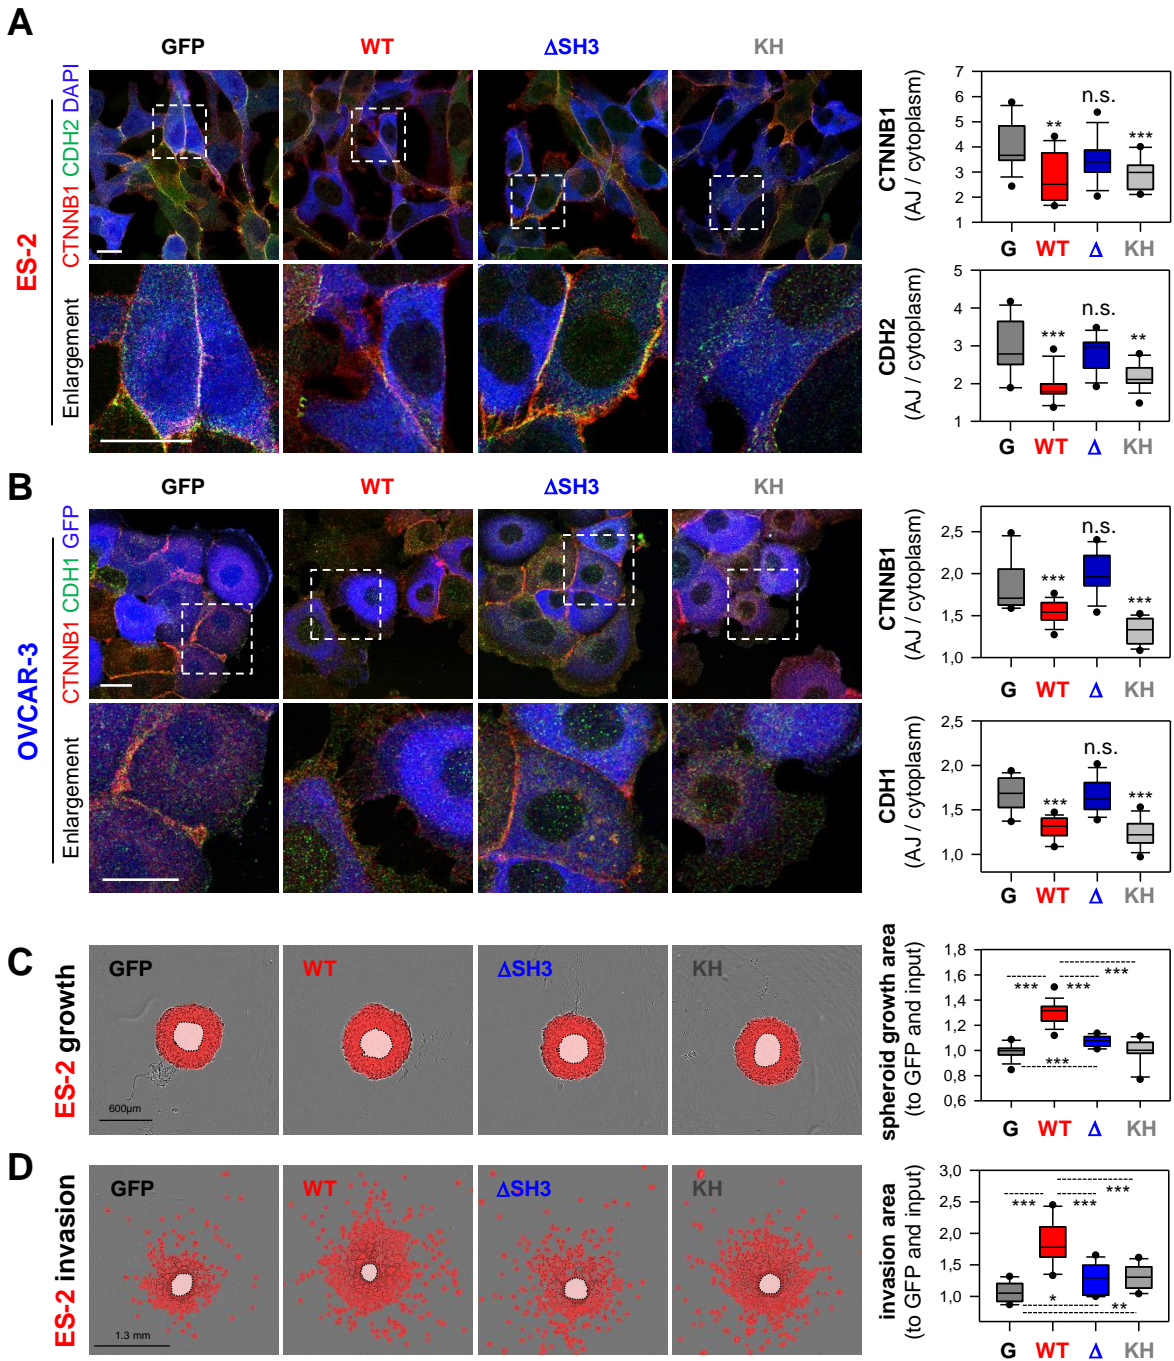

Bley et al., Figure 5

**Figure 5. IGF2BP1 promotes AJ disassembly VP<sub>4</sub>SS-dependent. (A,B)** Immunostaining of CTNNB1 and CDH2 or CDH1 upon the over-expression of GFP or indicated IGF2BP1 proteins (pseudo-colored in blue) in IGF2BP1-deleted ES-2 (A) or parental OVCAR-3 cells (B) were performed and analyzed as in Figure 1H,I. Dashed boxes indicate enlargements. Scale bars 25  $\mu$ m. **(C,D)** Spheroid growth (C) or invasion (D) of ES-2 cells stably expressing GFP or indicated IGF2BP1 proteins were performed and analyzed as in Figure 1J,K. Statistical significance was tested by Student's T-test or Mann-Whitney rank sum test. \*,  $p < 0.05$ ; \*\*,  $p < 0.01$ ; \*\*\*,  $p < 0.001$ .



## 1 **Combined SRCi/MEKi effectively impairs IGF2BP1-driven invasive growth**

2           The SRC inhibitor saracatinib showed anti-tumor activity in HG-SOC preclinical studies  
3 [38]. However, activation of the MAPK pathway is associated with resistance to saracatinib.  
4 MEK inhibition by selumetinib proved effective in re-sensitizing saracatinib resistant cells [2].  
5 Co-activation of SRC and MAPK was reported in HG-SOC patients and combined SRCi/MEKi  
6 impaired tumor growth *in vivo* more effectively than monotherapies [10]. We recently  
7 demonstrated that IGF2BP1 promotes ERK2 (MAPK1) and SRF expression by impairing  
8 miRNA-directed repression [15, 19]. Consequently, SRF-dependent MAPK signaling was  
9 reduced upon IGF2BP1 depletion [15]. Analyses in a panel of EOC-derived cells confirmed,  
10 IGF2BP1 is a conserved enhancer of ERK2 expression and MAPK signaling (Supplementary  
11 Figure S5A-C).

12           Currently, no clinically evaluated IGF2BP1 inhibitor is available. The small molecule  
13 inhibitor BTYNB impairs tumor cell growth and IGF2BP1-RNA binding *in vitro* [39]. However,  
14 it appeared unlikely to inhibit the RNA-binding independent control of SRC activity by IGF2BP1.  
15 Hence, we analyzed if saracatinib and/or selumetinib impair IGF2BP1-directed control of  
16 invasive growth.

17           To this end, we determined the EC<sub>50</sub> concentrations for both inhibitors in the 3D growth  
18 and invasion of ES-2 cells over-expressing GFP or GFP-IGF2BP1. Irrespective of IGF2BP1  
19 over-expression, selumetinib repressed 3D growth and saracatinib invasion at nearly equal  
20 potency (Supplementary Figure S5D,E). Conversely, IGF2BP1 over-expression induced a  
21 60% higher tolerance towards saracatinib under 3D growth conditions and four-fold higher  
22 invasion upon selumetinib treatment (Figure 6A,B). In support of this, EOC-derived cell lines  
23 were sensitized to growth inhibition by saracatinib (Sa; approximated EC<sub>50</sub> concentration of  
24 3μM) upon IGF2BP1 depletion and became more resistant by IGF2BP1 over-expression  
25 (Figure 6C). The inhibition of invasion by selumetinib (Se; approximated I<sub>max</sub> concentration of  
26 3μM) was elevated by IGF2BP1 depletion and decreased by its overexpression (Figure 6D).

27           To address if both inhibitors act in a synergistic or additive manner, combinatorial

1 treatment was performed using a 2D growth drug matrix analysis (Supplementary Figure S6A,  
2 B). This revealed additivity, indicated by synergy scores in-between -10 and 10, determined  
3 by three independent synergy models [40]. The maximal additive concentrations for IGF2BP1-  
4 expressing were approximately 6 $\mu$ M for both inhibitors. According to HSA model assumptions  
5 [40], the potential benefit of additive inhibition in 3D growth and invasion was analyzed at 3 $\mu$ M  
6 per drug in combined and 6 $\mu$ M in mono-treatments. Western blotting confirmed inhibition of  
7 both kinases by the respective inhibitors at these concentrations (Supplementary Figure S6C).

8           However, even at 6 $\mu$ M single saracatinib treatment remained substantially less efficient  
9 than selumetinib or combined treatment in 3D growth analyses (Figure 6E,F; Supplementary  
10 Figure S6D). The same was observed for selumetinib in 3D invasion studies (Figure 6G, H;  
11 Supplementary Figure S6E). Thus, only combined treatment was effective in inhibiting both,  
12 3D growth and invasion irrespective of IGF2BP1 overexpression.

13           Invasive growth in the peritoneum is a major complication in the progression of ovarian  
14 cancer. If combined treatment also impairs invasive growth *in vivo* was analyzed by  
15 intraperitoneal (IP) injection of iRFP-labeled (near-infrared red fluorescent protein) ES-2 cells  
16 expressing GFP or GFP-IGF2BP1. Cells were pre-treated with both inhibitors (3  $\mu$ M each),  
17 and DMSO for 48h and injected in the presence of both inhibitors at the same concentrations.  
18 Tumor growth was monitored by total iRFP signal in the peritoneum two weeks post injection  
19 of viable tumor cells (Figure 6I,J). IGF2BP1 over-expression led to higher tumor burden in  
20 DMSO treated controls, supporting the growth- and invasion-enhancing role of IGF2BP1  
21 observed *in cellulo* and previously reported [19]. Irrespective of IGF2BP1 expression, tumor  
22 growth was essentially abolished by combined treatment.

23           Together these observations indicated that combined treatment with selumetinib and  
24 saracatinib effectively impairs the IGF2BP1-dependent enhancement of invasive growth in  
25 EOC-derived cells *in vitro* and *in vivo*.

26

27

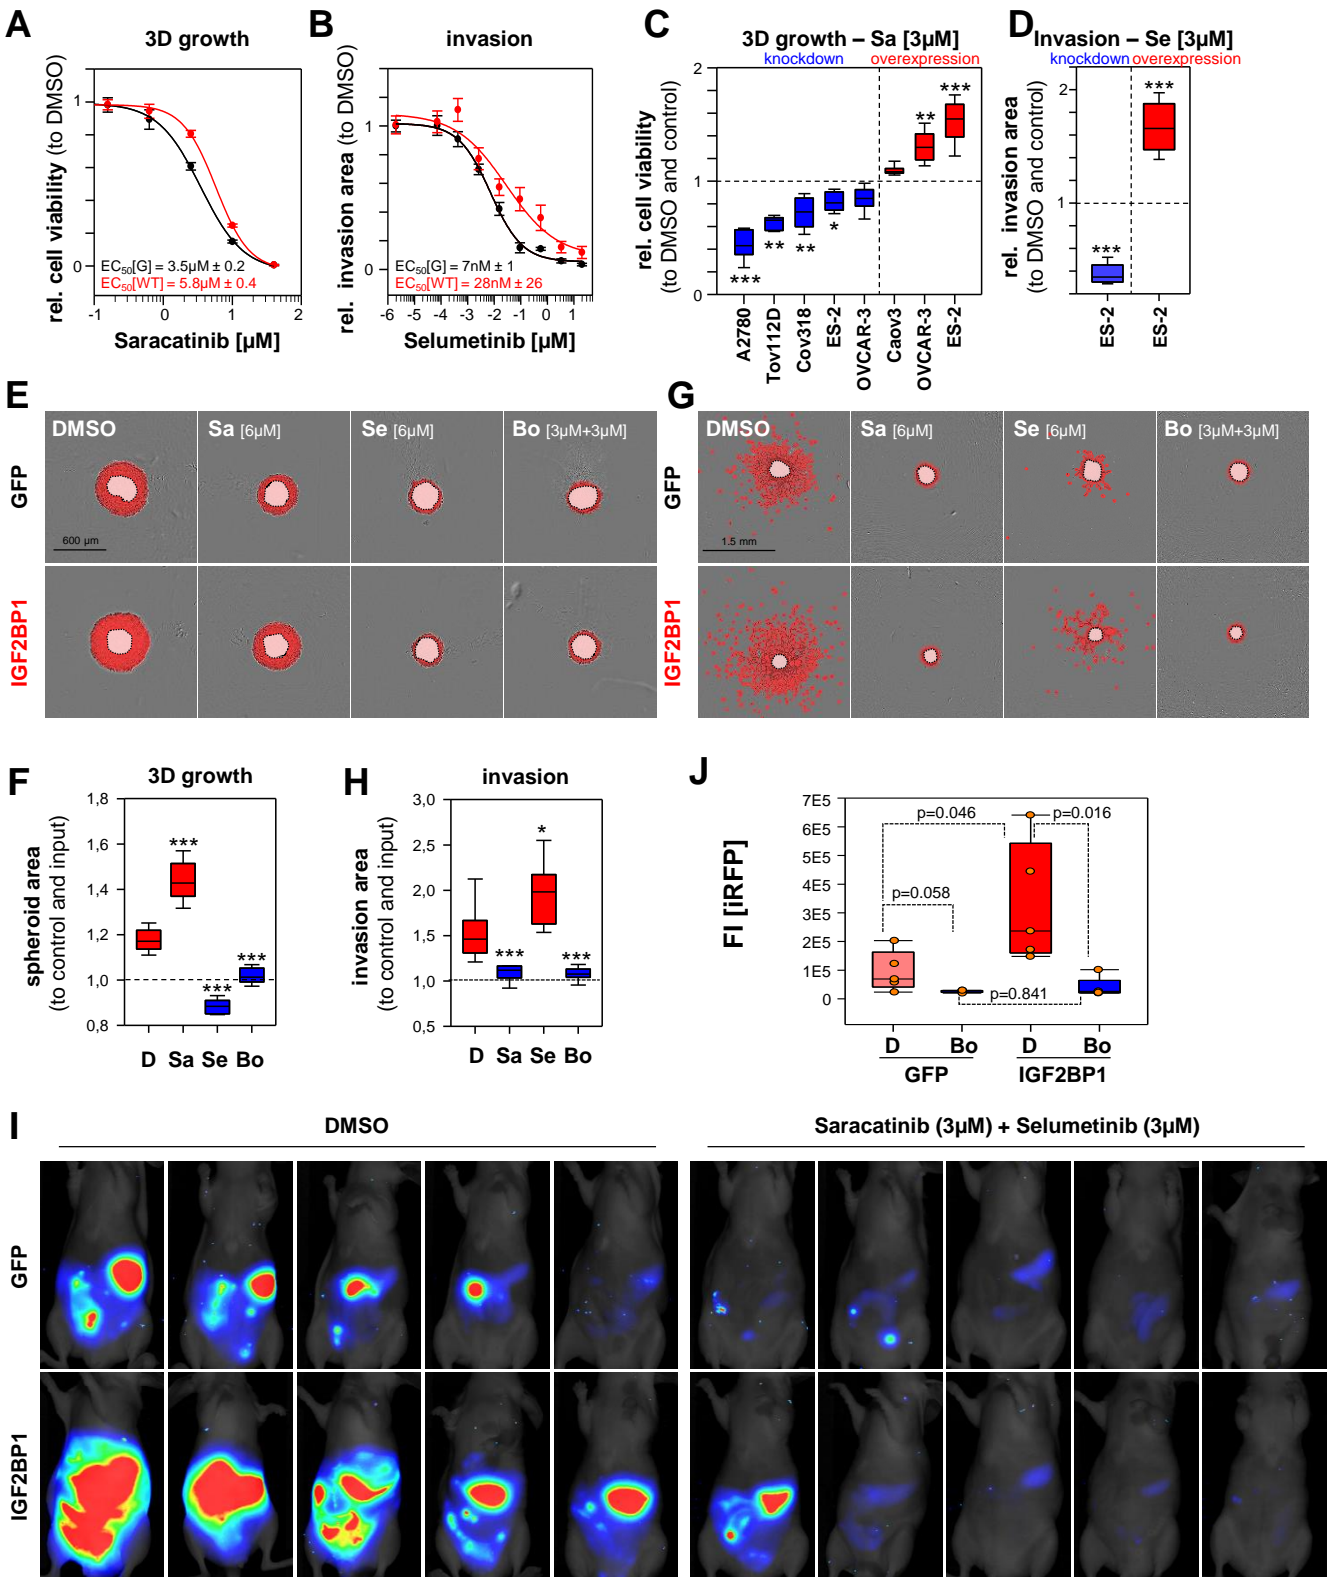

Bley et al., Figure 6

1 **Figure 6. IGF2BP1 promoted invasive growth is abolished by combined SRCi/MEKi**  
2 **treatment. (A-H)** Spheroid growth (A,C,E,F) or invasion (B,D,G,H) of GFP (controls) or  
3 IGF2BP1 over-expressing ES-2 cells was monitored and analyzed as in Figure (1J,K). All  
4 treatments at indicated concentrations were performed on pre-formed (24h) spheroids for  
5 indicated time and concentrations. Error bars indicate SE (A,B). **(I,J)** iRFP-labelled GFP or  
6 IGF2BP1 over-expressing ES-2 cells pre-treated with saracatinib (3 $\mu$ M) and selumetinib (3 $\mu$ M)  
7 or DMSO for 48h, were IP injected into nude mice with compounds at indicated concentrations.  
8 Tumor growth of five mice per conditions (I) was monitored and quantified (J) by infra-red  
9 imaging of the abdominal region 2 weeks post injection. Statistical significance was tested by  
10 Student's T-test or Mann-Whitney rank sum test. \*,  $p < 0.05$ ; \*\*,  $p < 0.01$ ; \*\*\*,  $p < 0.001$ .

11

12

### 13 **Discussion**

14 Enhanced expression of IGF2BP1 is associated with a mesenchymal/proliferative-like  
15 gene signature observed in approximately 30% of serous ovarian cancers [6-8]. This identifies  
16 IGF2BP1 as a novel marker of the mesenchymal-like C5 subtype of HG-SOCs [6]. In EOC-  
17 derived cells, IGF2BP1 promotes invasive growth by stimulating SRC/ERK-signaling. The  
18 protein enhances ERK2 abundance by stabilizing the respective mRNA, as previously reported  
19 [19]. In contrast, SRC-activation by IGF2BP1 is RNA-independent and solely relies on the  
20 conserved SRC/SH3-binding motif of IGF2BP1. This suggests that IGF2BP1 promotes SRC  
21 kinase activation by a ligand-binding-induced mechanism prior unknown for IGF2BP1. This is  
22 highly important for perspective drug-design approaches currently addressing IGF2BP1's RNA  
23 binding activity only [39]. However, full potential of IGF2BP1 enhanced invasive growth  
24 requires both, protein-dependent activation of SRC and RNA-binding associated regulation.

25 The activation of SRC is crucial for the pro-invasive role of IGF2BP1, since it promotes  
26 EMT by inducing the disassembly of AJs. This is abolished by ablating SRC activity using  
27 pharmacological inhibitors. This reveals a fundamental novel role of IGF2BP1, the  
28 interconnection of deregulated gene expression and cancer cell signaling. Consistent with this  
29 dual function promoting ERK/SRC signaling, the combined inhibition of MAPK- and SRC-  
30 signaling by selumetinib and saracatinib proves substantially more effective than  
31 monotherapies. This was validated IGF2BP1-dependent for the impairment of 3D growth and

1 invasion *in cellulo* and the peritoneal spread of tumor cells in experimental mouse tumor  
2 models. In support of this, previous studies report a substantial therapeutic benefit of combined  
3 inhibition of MAPK/SRC signaling in EOC tumor models [2, 10]. Thus, our findings suggest  
4 IGF2BP1 as a novel marker for EOC therapy. Considering the major problem of invasive  
5 growth associated with ovarian cancer spread in the abdominal cavity, the further investigation  
6 of IGF2BP1-driven cancer progression, in particular its roles in the mesenchymal subtype of  
7 HG-SOCs, appears mandatory. Along these lines, the direct targeting of IGF2BP1-dependent  
8 functions, for instance by impairing its RNA-binding by small molecules like BTYNB need to  
9 be evaluated.

10

11

## 12 **Materials and methods**

### 13 **Patient samples and IHC**

14 Human HG-SOC samples, collected from patients undergoing surgery, were prepared  
15 by the pathologist and immediately frozen (liquid nitrogen). HE staining confirmed tumor  
16 content of each sample. The study, including IHC and NGS analyses, was approved by the  
17 Ethics Committee of the Medical Faculty/Martin Luther University Halle/Wittenberg and written  
18 informed consent. IHC staining of FFPE samples was performed as previously described [41],  
19 using a Tris/EDTA buffer (pH 9) for antigen retrieval, a commercial IGF2BP1-directed antibody  
20 (MBL, Woburn, MA; ; Cat#. RN001M; RRID: AB\_1953026; dilution 1:100), DAB Enhancer  
21 (Dako/Agilent, Santa Clara, CA; Cat# S1961) for detection, and counterstaining by hemalm.  
22 IGF2BP1 staining was determined blinded by two pathologists using the immunoreactive  
23 score as described [42]: 0 – absent; 1-4 – weak; 5-8 – moderate; 9-12 – strong expression.  
24 A summary of samples, IGF2BP1 expression values and Remmele scores is provided as  
25 Supplementary Table T1B.

26

## 1 **Animal Handling and Ethics Approvals**

2 Immunodeficient athymic nude mice (FOXN1<sup>nu/nu</sup>) were obtained from Charles River  
3 (Wilmington, MA). Animals were handled according to the guidelines of the Martin Luther  
4 University based on ARRIVE guidelines. Permission was granted by the County Administration  
5 Office for Animal Care Saxony-Anhalt. iRFP-labelled IGF2BP1 over-expressing or GFP control  
6 ES-2 cells ( $7.5 \times 10^4$  living cells determined by Trypan Blue counting) pre-treated with 3 $\mu$ M  
7 saracatinib and 3 $\mu$ M selumetinib or DMSO for 48h were injected intraperitoneal (IP) into six-  
8 week old female nude mice (five mice per condition) together with these inhibitors at the same  
9 concentration. Tumor growth of isofluran-anaesthetized mice was monitored weekly by near-  
10 infrared imaging using a Pearl imager (LI-COR, Lincoln, NE) and quantified using the Image  
11 Studio software (LI-COR). Mice were sacrificed after 2 weeks, as IGF2BP1 over-expressing  
12 tumors reached termination criteria.

13

## 14 **NGS and quantitative proteomics**

15 NGS analyses of patient samples and cells were performed as previously described  
16 [19]. Total RNA-Seq data were deposited at NCBI GEO: (GSE147980) for EOC cohort or  
17 (GSE109605) for IGF2BP1 depletion in ES-2 cells. Quantitative proteomics were performed  
18 as described before [43]. In brief, TMT labeling of trypsin-digested proteins was performed  
19 according to the manufacturer's instructions (TMT-10plex kit, Thermo Fisher, Waltham, MA).  
20 Equal volumes of all samples were mixed, concentrated in a vacuum concentrator and acidified  
21 with TFA for LC/MS/MS analysis. Samples were separated by nano-HPLC (Ultimate RSLC  
22 3000, Thermo Fisher) using reversed phase C18 columns and 420-min gradients. The eluate  
23 was directly introduced into an Orbitrap Fusion Tribrid mass spectrometer (Thermo Fisher)  
24 equipped with nano-ESI source. Samples were analyzed using a collision-induced dissociation  
25 (combined ion trap-CID/high resolution-HCD) MS/MS strategy for peptide identification and  
26 reporter ion quantification. MS/MS data were searched against the NCBI database (version  
27 140412, taxonomy homo sapiens, 89,649 entries) using the Proteome Discoverer (version 2.0,

1 Thermo Fisher). Quantification was performed based on the reporter ion ratios derived from  
2 high-resolution MS/MS spectra. Proteomics data are shown as Supplementary Table T5.

3

#### 4 **Public data, GSEA and databases**

5 TCGA-OV-RNA-Seq data of the ovarian cancer cohort were obtained from GDC portal  
6 (<https://portal.gdc.cancer.gov/>). NGS data of ovarian cancer cell lines were downloaded from  
7 CCLE (Cancer Cell Line Encyclopedia) (<https://portals.broadinstitute.org/ccle>). Gene set  
8 enrichment analyses (GSEA; Supplementary Table T3) were performed as described before  
9 using the fold change expression of all genes between IGF2BP1 high and low expressing  
10 tumors (Supplementary Table T2) for gene ranking (18). Kaplan Meier plots for progression  
11 free survival (A) or overall survival (B) were generated with [www.kmplot.com](http://www.kmplot.com) (3) using the  
12 microarray based cohorts for ovarian cancer including the Australian data set by Tothill et al.  
13 (4). Synergy between saracatinib and selumetinib was tested using  
14 <https://synergyfinder.fimm.fi/> based on a drug matrix screen for various combinations and  
15 concentrations according to the online instructions (5).

16

#### 17 **Cell lines, culture conditions and transfections**

18 Ovarian cancer cell lines (Supplementary Table T6) and HEK293T cells for production  
19 of lentiviral particles were cultured in DMEM (Thermo Fisher) supplemented with 10% fetal  
20 bovine serum (FBS; Biochrom/Merck, Schaffhausen, Switzerland) at 37°C and 5% CO<sub>2</sub>. The  
21 most frequently used ES-2 cell line was authenticated by Eurofins Genomics using  
22 AmpFISTR® Identifiler® Plus PCR Amplification Kit (Thermo Fisher) for STR profiling.  
23 Mycoplasma testing was routinely performed every two months by PCR and DAPI staining.  
24 Reverse transfections of plasmids (Supplementary Table T8) or siRNA pools (15 nM;  
25 Supplementary Table T7) were carried out using Lipofectamine 2000 or Lipofectamine

1 RNAiMax (Thermo Fisher), respectively, according to the manufacturer's instructions. Lenti-  
2 viral particles were produced as previously described [28].

3 The following inhibitors were added in indicated concentrations and time: Saracatinib  
4 (Selleckchem, Houston, TX; Cat#S1006), Selumetinib (Selleckchem; Cat#S1008) and PP2  
5 (Sigma Aldrich, St. Louis, MO; Cat#P0042). Protein turnover was analyzed by addition of  
6 Emetine (100  $\mu$ M, Sigma Aldrich, Cat# E2375) and RNA decay by addition of Actinomycin D  
7 (5 $\mu$ M, Sigma Aldrich, Cat# A9415) for indicated time points 72h post siRNA transfections.  
8 Protein and mRNA abundances were analyzed by Western blotting or RT-qPCR as described  
9 in the Supplementary Information. For antibodies and primers see Supplementary Table T7  
10 and T8.

11

## 12 **Immunostainings**

13 Immunostainings were essentially performed as previously described (1,2). Primary  
14 and secondary antibodies are summarized in Supplementary Table T7. Images were acquired  
15 on Leica SP5X or SP8X confocal microscopes equipped with a white light laser and HyD  
16 detectors using a 63x Oil objective and standardized settings for sequential image acquisition  
17 at the Core Facility Imaging, University of Halle. Bright field images were taken using a Nikon  
18 TE-2000-E microscope with 20x magnification and phase contrast. Representative images are  
19 shown. The localization of CTNNB1, CDH1 and CDH2 at the site of adherents junctions was  
20 quantified with respect to the cytoplasm for 14-15 cells from three independent experiments  
21 using imageJ as depicted as box plot.

22

## 23 **3D spheroid growth and invasion assays**

24 For spheroid growth or invasion assays,  $1 \times 10^3$  cells in 50  $\mu$ L growth medium were  
25 seeded into round bottom ultra-low attachment plates (Corning, Corning, NY; Cat#7007),  
26 centrifuged for 5 min at 300 g and grown for 24h to induce spheroid formation. For all cell lines  
27 except ES-2 and SK-OV-3, Cultrex® 10X Spheroid Formation ECM (Trevigen, Gaithersburg,



1 MD; Cat# 3500-096-01) was added before centrifugation. For ES-2 and SK-OV-3 the addition  
2 of SFE was tested before the experiments with no improvement on 3D growth or invasion. For  
3 invasion assays, 50  $\mu$ L Matrigel (Corning, Cat# 354234) was added to preformed spheroids.  
4 Growth medium (100  $\mu$ L) supplemented with indicated inhibitors where stated was added  
5 before 3D growth or invasion were monitored using an Incucyte S3 (Sartorius, Göttingen,  
6 Germany) device for indicated time. Image analyses were performed using the Incucyte  
7 software for spheroid segmentation (indicated as mask overlays in the respective figures).  
8 Growth or invasion areas excluding the spheroid body are normalized to spheroid inputs.  
9 Representative images are shown. Quantifications represent in total 6-9 spheroids from three  
10 independent experiments shown as box plots.

11

## 12 **Antibodies, Western blotting and qRT-PCR**

13 For Western blotting, cells were harvested by a rubber policeman to minimize  
14 degradation of trans-membrane proteins. Total protein was extracted in TLB-buffer [50 mM  
15 Tris pH 7.4, 50 mM NaCl, 1 % SDS, 2 mM  $MgCl_2$ ] followed by DNA digestion using Benzonase  
16 (Merck). Equal amounts of total protein was loaded on NuPAGE Bis-Tris (4-12%) gels (Thermo  
17 Fisher), blotted onto nitrocellulose membrane (Amersham Bioscience) using the Mini Gel Tank  
18 Blotting system (Thermo Fisher) and analyzed using the Odyssey infrared scanner (LI-COR)  
19 as previously described (26). Primary and secondary antibodies are summarized in  
20 Supplementary Table T7.

21 Total RNA extracted using Trizol (Thermo Fisher) served as template for cDNA  
22 synthesis by random priming using M-MLV reverse transcription system (Promega, Madison,  
23 WI). qPCR was performed based on SYBRgreen I technology using the ORA qPCR Green  
24 ROX L Mix (HighQu, Kraichtal, Germany) on a LightCycler 480 II 384 format system (Roche,  
25 Basel, Switzerland). For all primer pairs an annealing temperature of 60°C in a 3-step protocol  
26 was used. Relative changes of RNA abundance were determined by the  $\Delta\Delta C_t$  method using

1 RPLP0 and GAPDH for normalization, as previously described (17). For primers see  
2 Supplementary Table T8.

3

#### 4 **Plasmids, cloning and luciferase reporter assays**

5 Plasmid generation including the respective templates, vectors, restriction sites and  
6 oligonucleotide sequences and cloning strategies are summarized in Supplementary Table T8.  
7 All PCR (polymerase chain reaction) amplified inserts were sequenced before subcloning in  
8 the respective vectors. ES-2 cells transfected with siRNAs (24h) were splitted for re-  
9 transfection of pmir-Glo luciferase plasmids (Supplementary Table T7) for additional 48h.  
10 Luciferase reporter analyses were performed essentially as previously described (17).  
11 Reporters containing a minimal vector-encoded 3'UTR (MCS) served as normalization  
12 controls.

13

#### 14 **Statistical analyses**

15 All cell culture experiments were performed in biological triplicates unless otherwise  
16 stated. Western blot quantifications are shown as mean  $\pm$  SD. Whisker caps of box plots depict  
17 the 5<sup>th</sup>/95<sup>th</sup> percentile and all outliers are shown. Spheroid growth and invasion curves are  
18 shown as mean  $\pm$  SE. Statistical significance was tested by Student's T-test (two-tailed) or  
19 Mann-Whitney Rank-Sum test after data distribution was checked by Shapiro-Wilk normality  
20 test using Sigma Plot.

21

#### 22 **Acknowledgements and Funding**

23 The work was supported by Wilhelm-Roux funding to NB and DFG funding (GRK1591) to SH.  
24 Imaging, image analyses and NGS analyses were performed at the Core Facility Imaging (CFI)  
25 of the Martin-Luther University Halle-Wittenberg, Germany.

1  
2  
3  
4  
5  
6  
7  
8  
9  
10  
11  
12  
13  
14  
15  
16  
17  
18  
19  
20  
21  
22  
23  
24  
25  
26  
27  
28  
29  
30  
31  
32  
33  
34  
35  
36  
37  
38  
39  
40  
41  
42  
43  
44  
45  
46  
47

**Disclosure of Potential Conflicts of Interests:** the authors declare no conflicts of interest.

## References

- 1 Bowtell DD, Bohm S, Ahmed AA, Aspuria PJ, Bast RC, Jr., Beral V *et al.* Rethinking ovarian cancer II: reducing mortality from high-grade serous ovarian cancer. *Nat Rev Cancer* 2015; 15: 668-679.
- 2 McGivern N, El-Helali A, Mullan P, McNeish IA, Paul Harkin D, Kennedy RD *et al.* Activation of MAPK signalling results in resistance to saracatinib (AZD0530) in ovarian cancer. *Oncotarget* 2018; 9: 4722-4736.
- 3 Kondrashova O, Nguyen M, Shield-Artin K, Tinker AV, Teng NNH, Harrell MI *et al.* Secondary Somatic Mutations Restoring RAD51C and RAD51D Associated with Acquired Resistance to the PARP Inhibitor Rucaparib in High-Grade Ovarian Carcinoma. *Cancer Discov* 2017; 7: 984-998.
- 4 Mittica G, Ghisoni E, Giannone G, Genta S, Aglietta M, Sapino A *et al.* PARP Inhibitors in Ovarian Cancer. *Recent Pat Anticancer Drug Discov* 2018; 13: 392-410.
- 5 McNeish IA, Ledermann JA, Webber L, James L, Kaye SB, Hall M *et al.* A randomised, placebo-controlled trial of weekly paclitaxel and saracatinib (AZD0530) in platinum-resistant ovarian, fallopian tube or primary peritoneal cancer. *Ann Oncol* 2014; 25: 1988-1995.
- 6 Tothill RW, Tinker AV, George J, Brown R, Fox SB, Lade S *et al.* Novel molecular subtypes of serous and endometrioid ovarian cancer linked to clinical outcome. *Clinical cancer research : an official journal of the American Association for Cancer Research* (Research Support, Non-U.S. Gov't Research Support, U.S. Gov't, Non-P.H.S.) 2008; 14: 5198-5208.
- 7 Integrated genomic analyses of ovarian carcinoma. *Nature* (Research Support, N.I.H., Extramural) 2011; 474: 609-615.
- 8 Konecny GE, Winterhoff B, Wang C. Gene-expression signatures in ovarian cancer: Promise and challenges for patient stratification. *Gynecol Oncol* (Review) 2016; 141: 379-385.
- 9 Daugherty RL, Gottardi CJ. Phospho-regulation of Beta-catenin adhesion and signaling functions. *Physiology (Bethesda)* 2007; 22: 303-309.
- 10 Simpkins F, Jang K, Yoon H, Hew KE, Kim M, Azzam DJ *et al.* Dual Src and MEK Inhibition Decreases Ovarian Cancer Growth and Targets Tumor Initiating Stem-Like Cells. *Clinical cancer research : an official journal of the American Association for Cancer Research* 2018; 24: 4874-4886.
- 11 Roura S, Miravet S, Piedra J, Garcia de Herreros A, Dunach M. Regulation of E-cadherin/Catenin association by tyrosine phosphorylation. *J Biol Chem* 1999; 274: 36734-36740.

- 1 12 Qi J, Wang J, Romanyuk O, Siu CH. Involvement of Src family kinases in N-cadherin  
2 phosphorylation and beta-catenin dissociation during transendothelial migration of melanoma  
3 cells. *Mol Biol Cell* 2006; 17: 1261-1272.
- 4
- 5 13 Matsuyoshi N, Hamaguchi M, Taniguchi S, Nagafuchi A, Tsukita S, Takeichi M. Cadherin-  
6 mediated cell-cell adhesion is perturbed by v-src tyrosine phosphorylation in metastatic  
7 fibroblasts. *J Cell Biol* 1992; 118: 703-714.
- 8
- 9 14 Fang D, Chen H, Zhu JY, Wang W, Teng Y, Ding HF *et al.* Epithelial-mesenchymal transition of  
10 ovarian cancer cells is sustained by Rac1 through simultaneous activation of MEK1/2 and Src  
11 signaling pathways. *Oncogene* 2017; 36: 1546-1558.
- 12
- 13 15 Muller S, Glass M, Singh AK, Haase J, Bley N, Fuchs T *et al.* IGF2BP1 promotes SRF-  
14 dependent transcription in cancer in a m6A- and miRNA-dependent manner. *Nucleic Acids Res*  
15 2019; 47: 375-390.
- 16
- 17 16 Farley J, Brady WE, Vathipadiekal V, Lankes HA, Coleman R, Morgan MA *et al.* Selumetinib in  
18 women with recurrent low-grade serous carcinoma of the ovary or peritoneum: an open-label,  
19 single-arm, phase 2 study. *Lancet Oncol* 2013; 14: 134-140.
- 20
- 21 17 Bell JL, Wachter K, Muhleck B, Pazaitis N, Kohn M, Lederer M *et al.* Insulin-like growth factor 2  
22 mRNA-binding proteins (IGF2BPs): post-transcriptional drivers of cancer progression? *Cellular*  
23 *and molecular life sciences : CMLS* 2013; 70: 2657-2675.
- 24
- 25 18 Busch B, Bley N, Muller S, Glass M, Misiak D, Lederer M *et al.* The oncogenic triangle of  
26 HMGA2, LIN28B and IGF2BP1 antagonizes tumor-suppressive actions of the let-7 family.  
27 *Nucleic acids research (Research Support, Non-U.S. Gov't)* 2016; 44: 3845-3864.
- 28
- 29 19 Muller S, Bley N, Glass M, Busch B, Rousseau V, Misiak D *et al.* IGF2BP1 enhances an  
30 aggressive tumor cell phenotype by impairing miRNA-directed downregulation of oncogenic  
31 factors. *Nucleic Acids Res* 2018; 46: 6285-6303.
- 32
- 33 20 Bi Z, Liu Y, Zhao Y, Yao Y, Wu R, Liu Q *et al.* A dynamic reversible RNA N(6) -methyladenosine  
34 modification: current status and perspectives. *J Cell Physiol* 2019; 234: 7948-7956.
- 35
- 36 21 Elcheva I, Goswami S, Noubissi FK, Spiegelman VS. CRD-BP protects the coding region of  
37 betaTrCP1 mRNA from miR-183-mediated degradation. *Molecular cell* 2009; 35: 240-246.
- 38
- 39 22 Boyerinas B, Park SM, Murmann AE, Gwin K, Montag AG, Zillhardt M *et al.* Let-7 modulates  
40 acquired resistance of ovarian cancer to Taxanes via IMP-1-mediated stabilization of multidrug  
41 resistance 1. *Int J Cancer* 2012; 130: 1787-1797.
- 42
- 43 23 Goswami S, Tarapore RS, Teslaa JJ, Grinblat Y, Setaluri V, Spiegelman VS. MicroRNA-340-  
44 mediated degradation of microphthalmia-associated transcription factor mRNA is inhibited by  
45 the coding region determinant-binding protein. *The Journal of biological chemistry (Retracted*  
46 *Publication)* 2010; 285: 20532-20540.
- 47
- 48 24 Huttelmaier S, Zenklusen D, Lederer M, Dichtenberg J, Lorenz M, Meng X *et al.* Spatial regulation  
49 of beta-actin translation by Src-dependent phosphorylation of ZBP1. *Nature* 2005; 438: 512-  
50 515.
- 51

- 1 25 Weng Z, Taylor JA, Turner CE, Brugge JS, Seidel-Dugan C. Detection of Src homology 3-  
2 binding proteins, including paxillin, in normal and v-Src-transformed Balb/c 3T3 cells. *The*  
3 *Journal of biological chemistry* 1993; 268: 14956-14963.
- 4
- 5 26 Kobel M, Weidensdorfer D, Reinke C, Lederer M, Schmitt WD, Zeng K *et al.* Expression of the  
6 RNA-binding protein IMP1 correlates with poor prognosis in ovarian carcinoma. *Oncogene*  
7 2007; 26: 7584-7589.
- 8
- 9 27 Stohr N, Kohn M, Lederer M, Glass M, Reinke C, Singer RH *et al.* IGF2BP1 promotes cell  
10 migration by regulating MK5 and PTEN signaling. *Genes & development* 2012; 26: 176-189.
- 11
- 12 28 Zirkel A, Lederer M, Stohr N, Pazaitis N, Huttelmaier S. IGF2BP1 promotes mesenchymal cell  
13 properties and migration of tumor-derived cells by enhancing the expression of LEF1 and SNAI2  
14 (SLUG). *Nucleic Acids Res* 2013; 41: 6618-6636.
- 15
- 16 29 Ishiyama N, Lee SH, Liu S, Li GY, Smith MJ, Reichardt LF *et al.* Dynamic and static interactions  
17 between p120 catenin and E-cadherin regulate the stability of cell-cell adhesion. *Cell* 2010; 141:  
18 117-128.
- 19
- 20 30 Gu W, Wells AL, Pan F, Singer RH. Feedback regulation between zipcode binding protein 1  
21 and beta-catenin mRNAs in breast cancer cells. *Molecular and cellular biology* (Research  
22 Support, N.I.H., Extramural) 2008; 28: 4963-4974.
- 23
- 24 31 Davis MA, Ireton RC, Reynolds AB. A core function for p120-catenin in cadherin turnover. *J Cell*  
25 *Biol* 2003; 163: 525-534.
- 26
- 27 32 Schaller MD. Paxillin: a focal adhesion-associated adaptor protein. *Oncogene* 2001; 20: 6459-  
28 6472.
- 29
- 30 33 Yeatman TJ. A renaissance for SRC. *Nat Rev Cancer* 2004; 4: 470-480.
- 31
- 32 34 Yadav SS, Miller WT. Cooperative activation of Src family kinases by SH3 and SH2 ligands.  
33 *Cancer Lett* 2007; 257: 116-123.
- 34
- 35 35 Ostareck-Lederer A, Ostareck DH, Cans C, Neubauer G, Bomsztyk K, Superti-Furga G *et al.* c-  
36 Src-mediated phosphorylation of hnRNP K drives translational activation of specifically silenced  
37 mRNAs. *Mol Cell Biol* 2002; 22: 4535-4543.
- 38
- 39 36 Frisone P, Pradella D, Di Matteo A, Belloni E, Ghigna C, Paronetto MP. SAM68: Signal  
40 Transduction and RNA Metabolism in Human Cancer. *Biomed Res Int* 2015; 2015: 528954.
- 41
- 42 37 Wachter K, Kohn M, Stohr N, Huttelmaier S. Subcellular localization and RNP formation of  
43 IGF2BPs (IGF2 mRNA-binding proteins) is modulated by distinct RNA-binding domains. *Biol*  
44 *Chem* 2013; 394: 1077-1090.
- 45
- 46 38 Simpkins F, Hevia-Paez P, Sun J, Ullmer W, Gilbert CA, da Silva T *et al.* Src Inhibition with  
47 saracatinib reverses fulvestrant resistance in ER-positive ovarian cancer models in vitro and in  
48 vivo. *Clinical cancer research : an official journal of the American Association for Cancer*  
49 *Research* 2012; 18: 5911-5923.
- 50

- 1 39 Mahapatra L, Andruska N, Mao C, Le J, Shapiro DJ. A Novel IMP1 Inhibitor, BTYNB, Targets  
2 c-Myc and Inhibits Melanoma and Ovarian Cancer Cell Proliferation. *Transl Oncol* 2017; 10:  
3 818-827.
- 4  
5 40 Ianevski A, He L, Aittokallio T, Tang J. SynergyFinder: a web application for analyzing drug  
6 combination dose-response matrix data. *Bioinformatics* 2017; 33: 2413-2415.
- 7  
8 41 Gutschner T, Hammerle M, Pazaitis N, Bley N, Fiskin E, Uckelmann H *et al.* Insulin-like growth  
9 factor 2 mRNA-binding protein 1 (IGF2BP1) is an important protumorigenic factor in  
10 hepatocellular carcinoma. *Hepatology* 2014; 59: 1900-1911.
- 11  
12 42 Remmele W, Stegner HE. [Recommendation for uniform definition of an immunoreactive score  
13 (IRS) for immunohistochemical estrogen receptor detection (ER-ICA) in breast cancer tissue].  
14 *Pathologe* 1987; 8: 138-140.
- 15  
16 43 Ihling A, Ihling CH, Sinz A, Gekle M. Acidosis-Induced Changes in Proteome Patterns of the  
17 Prostate Cancer-Derived Tumor Cell Line AT-1. *J Proteome Res* 2015; 14: 3996-4004.
